# Supplementary material for: Efficient addition of alcohols, amines and phenol to unactivated alkenes by AuIII or PdII stabilized by CuCl2
Source: Royal Society of Chemistry journal article supplement (doi:10.1039/b714617e), 2007-12-12
Supplement: b714617e.pdf [file b714617e.pdf]

## **Enhancement of Gold(III) Salt Utilization in Activation Alkenes by Addition of CuCl<sub>2</sub>**

Xin Zhang and Avelino Corma\*

Instituto de Tecnología Química, UPV-CSIC, Universidad Politécnica de Valencia

Avda. de los Naranjos s/n, 46022 Valencia (Spain),

Fax: (+34) 96-387-7809

E-mail: [acorma@itq.upv.es](mailto:acorma@itq.upv.es)

### **GC/MS and <sup>1</sup>H-NMR Analysis**

GC/MS analyses were performed on a Agilent 5973N spectrometer equipped with the same column and in the same conditions as GC.

Flash column chromatograph was performed over silica gel (0.04–0.06 mm, Scharlau) using the mixtures of hexane and ethyl acetate (hexane/ethyl acetate = 95: 1) as effluent. <sup>1</sup>H-NMR spectra were recorded in CDCl<sub>3</sub> (or CD<sub>3</sub>OD) with TMS as an internal standard at ambient temperature on a Bruker Avance 300 operating at 300 MHz.

### 1-Methoxyethylbenzene

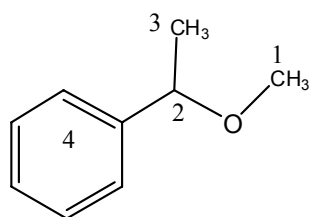

<sup>1</sup>H-NMR δ: 7.2 (m, 5H, C<sub>6</sub>H<sub>5</sub>), 4.3 (q, 1H, C2-H), 3.2 (s, 3H, C1-H), 1.5 (d, 3H, C3-H)

MS (80 eV): m/z (%) = 136 (3) (M<sup>+</sup>), 121 (100), 105 (29), 77 (20), 51(10), 91(10)

### 1-Ethoxyethylbenzene

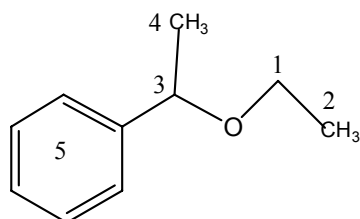

<sup>1</sup>H-NMR δ: 7.3 (m, 5H, C<sub>6</sub>H<sub>5</sub>), 4.2–4.4 (q, 1H, C3-H), 3.1–3.3 (q, 2H, C1-H), 1.5 (d, 3H, C4-H), 1.1 (t, 3H, C2-H)

MS (80 eV): m/z (%) = 150 (2) (M<sup>+</sup>), 135 (100), 105 (100), 77 (55), 79(47), 43(29)

### 1-Propoxyethylbenzene

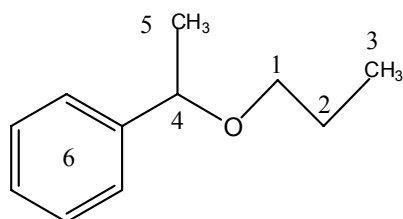

<sup>1</sup>H-NMR δ: 7.3 (m, 5H, C<sub>6</sub>H<sub>5</sub>), 4.2–4.4(q, 1H, C4-H), 3.1–3.3 (t, 2H, C1-H), 1.5 (d, 3H,

C5-H), 1.2–1.3 (m, 2H, C2-H), 0.8 (t, 3H, C3-H)

MS (80 eV):  $m/z$  (%) = 164 (0.5) ( $M^+$ ), 107 (100), 105 (88), 149 (73), 79(38), 43(29)

1-(2-Methyl-ethoxyethyl)-benzene

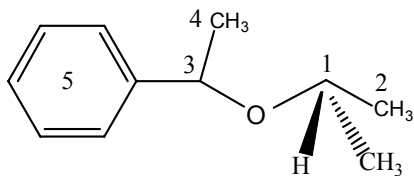

(Contain diastereomeric pairs)

$^1\text{H-NMR}$   $\delta$ : 7.2 (m, 5H,  $\text{C}_6\text{H}_5$ ), 4.3–4.4(q, 1H, C3-H), 3.2–3.3 (q, 1H, C1-H), 1.5 (d, 3H, C4-H), 1.2 (d, 3H, C2-H)

MS (80 eV):  $m/z$  (%) = 164 (0.3) ( $M^+$ ), 107 (100), 105 (92), 149 (44), 79(38), 77(30)

1-Butoxyethylbenzene

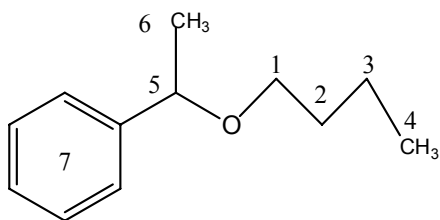

$^1\text{H-NMR}$   $\delta$ : 7.3 (m, 5H,  $\text{C}_6\text{H}_5$ ), 4.3–4.4 (q, 1H, C5-H), 3.2–3.5 (t, 2H, C1-H), 1.5 (d, 3H, C6-H), 1.2 (m, 2H,  $\text{CH}_2$  (2-3)), 0.8 (t, 3H, C4-H)

MS (80 eV):  $m/z$  (%) = 178 (Tr) ( $M^+$ ), 107 (100), 105 (88), 163 (74), 79 (28), 77 (21)

### 1-(2-Methyl-propoxyethyl)-benzene

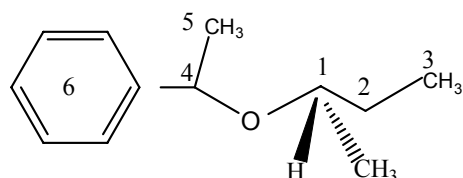

(Contain diastereomeric pairs)

$^1\text{H-NMR}$   $\delta$ : 7.3 (m, 5H,  $\text{C}_6\text{H}_5$ ), 4.3–4.4 (q, 1H, C4-H), 3.0 (m, 1H, C1-H), 1.5 (d, 3H, C5-H), 1.2 (d, 3H, C1- $\text{CH}_3$ ), 1.3–1.4 (q, 2H, C2-H), 0.8 (t, 3H, C3-H)

MS (80 eV):  $m/z$  (%) = 178 (Tr) ( $\text{M}^+$ ), 105 (100), 107 (36), 163 (23), 106 (16), 79(13)

### 2-(1-Phenylethoxy)-ethanol

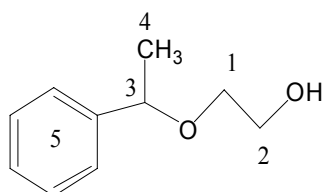

$^1\text{H-NMR}$   $\delta$ : 7.2 (m, 5H,  $\text{C}_6\text{H}_5$ ), 4.3–4.4 (q, 1H, C3-H), 3.4–3.5 (t, 2H, C1-H), 3.2 (s, 1H, C2-OH), 3.7 (t, 2H, C2-H), 1.5 (d, 3H, C4-H)

MS (80 eV):  $m/z$  (%) = 166 (13) ( $\text{M}^+$ ), 105 (100), 151 (41), 79 (25), 77 (23), 121 (21)

### 4-Methyl-1-methoxyethylbenzene

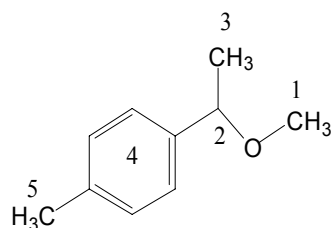

$^1\text{H-NMR}$   $\delta$ : 7.1 (m, 5H,  $\text{C}_6\text{H}_5$ ), 4.3 (q, 1H, C2-H), 3.2 (s, 3H, C1-H), 1.5 (d, 3H, C3-H), 2.4 (s, 3H, C5-H)

MS (80 eV):  $m/z$  (%) = 150 (8) ( $\text{M}^+$ ), 135 (100), 91 (60), 119 (41), 136 (15), 117 (13)

#### 4-Chloro-1-methoxyethylbenzene

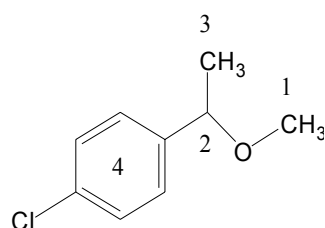

$^1\text{H-NMR}$   $\delta$ : 7.1–7.2 (m, 5H,  $\text{C}_6\text{H}_5$ ), 4.3 (q, 1H, C2-H), 3.2 (s, 3H, C1-H), 1.5 (d, 3H, C3-H)

MS (80 eV):  $m/z$  (%) = 170 (5) ( $\text{M}^+$ ), 155 (100), 157 (33), 139 (26), 91 (25), 103 (24)

#### 2-Methoxyoctane

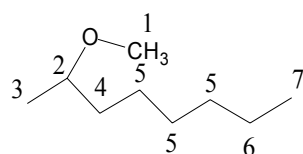

$^1\text{H-NMR}$   $\delta$ : 3.2 (s, 3H, C1-H), 3.0 (m, 1H, C2-H), 1.4 (q, 2H, C4-H), 1.29 (m, 2H, C5-H), 1.33 (m, 2H, C6-H), 1.2 (d, 3H, C3-H), 1.0 (t, 3H, C7-H)

MS (80 eV):  $m/z$  (%) = 144 (Tr) ( $\text{M}^+$ ), 59 (100), 55 (23), 60 (8), 58 (8), 112 (1)

#### 1-Methyl-1-methoxycyclohexane

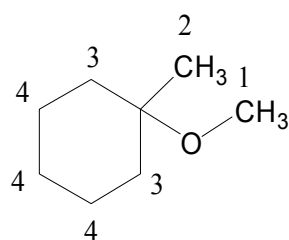

$^1\text{H-NMR}$   $\delta$ : 3.1 (s, 3H, C1-H), 1.5–1.6 (t, 2H, C3-H), 1.2–1.4 (t, 2H, C4-H),  
1.1 (s, 3H, C1-H),

MS (80 eV):  $m/z$  (%) = 128 (48) ( $\text{M}^+$ ), 85 (100), 72 (92), 55 (88), 113 (66), 81 (39)

#### Phenyl-(1-phenyl-ethyl)-amine

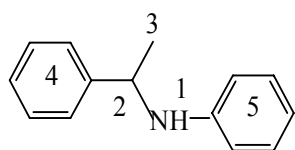

$^1\text{H-NMR}$   $\delta$ : 4.0 (d, 1H, CN-H), 4.1 (q, 1H, C2-H), 1.5 (d, 3H, C3-H),  
7.1–7.3 (m, 5H, 4- $\text{C}_6\text{H}_5$ ), 6.4–7.1 (m, 5H, 5- $\text{C}_6\text{H}_5$ )

MS (80 eV):  $m/z$  (%) = 197 (75) ( $\text{M}^+$ ), 182 (100), 105 (84), 93 (52), 77 (34)

#### Phenyl-(1-*p*-tolyl-ethyl)-amine

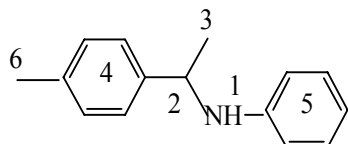

$^1\text{H-NMR}$   $\delta$ : 4.0 (d, 1H, CN-H), 4.1 (q, 1H, C2-H), 1.5 (d, 3H, C3-H),  
7.1 (m, 4H, 4- $\text{C}_6\text{H}_5$ ), 6.4–7.0 (m, 5H, 5- $\text{C}_6\text{H}_5$ ), 2.4 (s, 3H, C6-H)

MS (80 eV):  $m/z$  (%) = 211 (Tr) ( $\text{M}^+$ ), 91 (100), 196 (79), 105 (17)

#### 4-Methyl-*N*-(1-phenyl-ethyl)-benzenesulfonamide

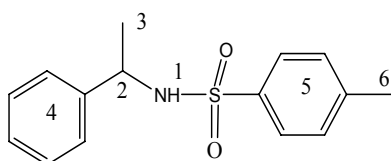

$^1\text{H-NMR}$   $\delta$ : 2.0 (d, 1H, CN-H), 4.1 (q, 1H, C2-H), 1.4 (d, 3H, C3-H),  
7.1 (m, 5H, 4-C<sub>6</sub>H<sub>5</sub>), 7.3–7.8 (m, 4H, 5-C<sub>6</sub>H<sub>5</sub>), 2.4 (s, 3H, C6-H)

MS (80 eV):  $m/z$  (%) = 275 (Tr) ( $\text{M}^+$ ), 91 (100), 260 (85), 155 (69), 120 (66)

#### 4-Methyl-*N*-(1-*p*-tolyl-ethyl)-benzenesulfonamide

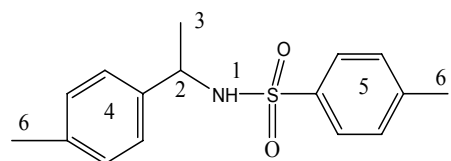

$^1\text{H-NMR}$   $\delta$ : 2.0 (d, 1H, CN-H), 4.1 (q, 1H, C2-H), 1.4 (d, 3H, C3-H),  
7.0 (m, 4H, 4-C<sub>6</sub>H<sub>5</sub>), 7.3–7.8 (m, 4H, 5-C<sub>6</sub>H<sub>5</sub>), 2.4 (s, 3H, C6-H)

MS (80 eV):  $m/z$  (%) = 289 (Tr) ( $\text{M}^+$ ), 274 (100), 134 (99), 91 (94), 155 (50).

#### 4-Methyl-*N*-(1-methyl-cyclohexyl)-benzenesulfonamide

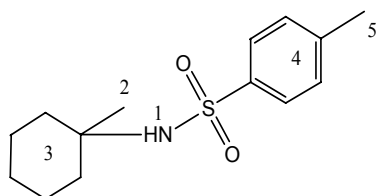

$^1\text{H-NMR}$   $\delta$ : 2.0 (s, 1H, CN-H), 1.2 (s, 3H, C2-H),  
1.4–1.6 (m, 10H, C3-H), 7.3–7.8 (m, 4H, 4-C<sub>6</sub>H<sub>5</sub>), 2.4 (s, 3H, C5-H).

MS (80 eV):  $m/z$  (%) = 267 (28) ( $\text{M}^+$ ), 224 (100), 91 (94), 155 (78), 112 (34).

#### (1-Methyl-cyclohexyl)-carbamic acid benzyl ester

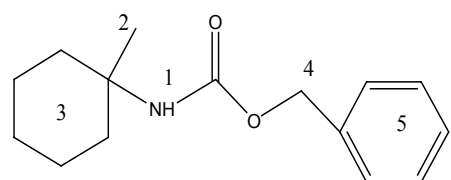

$^1\text{H-NMR}$   $\delta$ : 8.1 (s, 1H, CN-H), 1.4 (s, 3H, C2-H), 1.4–1.6 (m, 10H, C3-H), 5.3 (s, 2H, C4-H), 7.3 (m, 5H, 5-C<sub>6</sub>H<sub>5</sub>).

MS (80 eV):  $m/z$  (%) = 247 (3) (M<sup>+</sup>), 91 (100), 156 (15), 160 (15), 108 (12).

### 1-Methoxy-4-(1-phenyl-ethoxy)-benzene

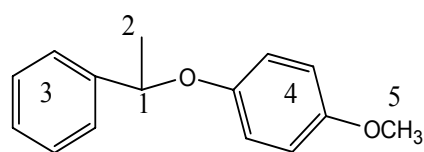

$^1\text{H-NMR}$   $\delta$ : 5.2 (q, 1H, C1-H), 1.7 (d, 3H, C2-H), 7.3 (m, 5H, 3-C<sub>6</sub>H<sub>5</sub>) 6.7 (m, 4H, 4-C<sub>6</sub>H<sub>4</sub>), 3.7 (s, 3H, C5-H).

MS (80 eV):  $m/z$  (%) = 228 (100) (M<sup>+</sup>), 213 (83), 150 (56), 198 (27), 135 (24).

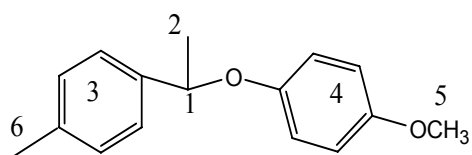

$^1\text{H-NMR}$   $\delta$ : 5.2 (q, 1H, C1-H), 1.7 (d, 3H, C2-H), 7.1 (m, 4H, 3-C<sub>6</sub>H<sub>5</sub>) 6.7 (m, 4H, 4-C<sub>6</sub>H<sub>4</sub>), 3.7 (s, 3H, C5-H), 2.4 (s, 3H, C6-H).

MS (80 eV):  $m/z$  (%) = 242 (100) (M<sup>+</sup>), 150 (81), 227 (74), 135 (20), 212 (15).
